# Supplementary material for: Formation of halogenated disinfection by-products during ballast water chlorination
Source: Royal Society of Chemistry journal article supplement (doi:10.1039/d1ew00674f), 2021-12-14
Supplement: d1ew00674f1.pdf [file d1ew00674f1.pdf]

## Supporting Information

### Formation of halogenated disinfection by-products during ballast water chlorination

Hui Zhang<sup>a,b</sup>, Junzeng Xue<sup>a,b</sup>, Qiong Wang<sup>a,b</sup>, Lin Yuan<sup>a,b</sup>, Huixian Wu<sup>\*a,b</sup>

<sup>a</sup>*College of Marine Ecology and Environment, Shanghai Ocean University,*

*Shanghai, 201306, China*

<sup>b</sup>*Centre for Research on the Ecological Security of Ports and Shipping, Shanghai*

*Ocean University, Shanghai, 201306, China*

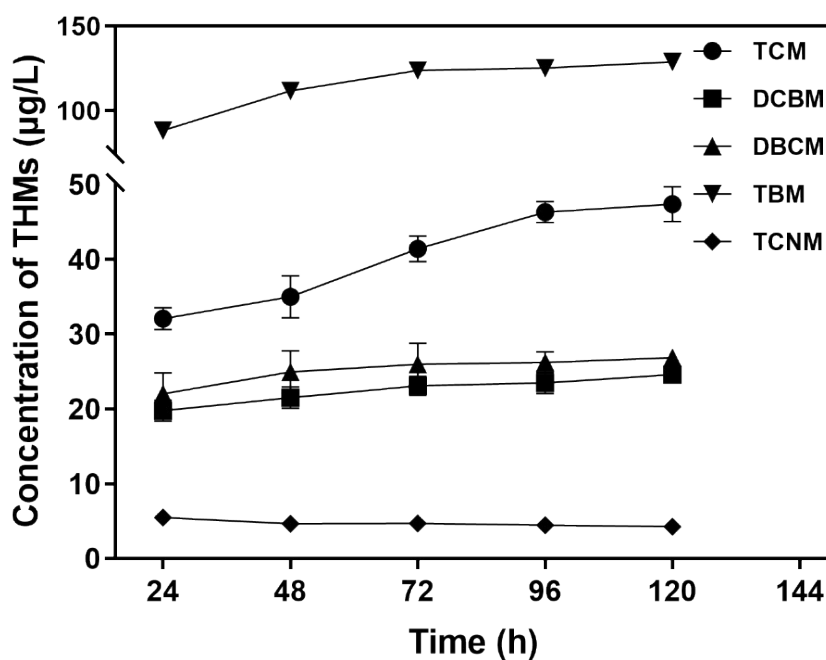

Figure S1. The formation of THMs during ballast water chlorination under a certain condition ( $C(\text{NaClO})=10$  mg/L,  $C(\text{TOC})=5.0$  mg/L,  $C(\text{Br}^-)=68$  mg/L,  $C(\text{I}^-)=60$  mg/L,  $T=20$  °C,  $\text{pH}=8$ ).

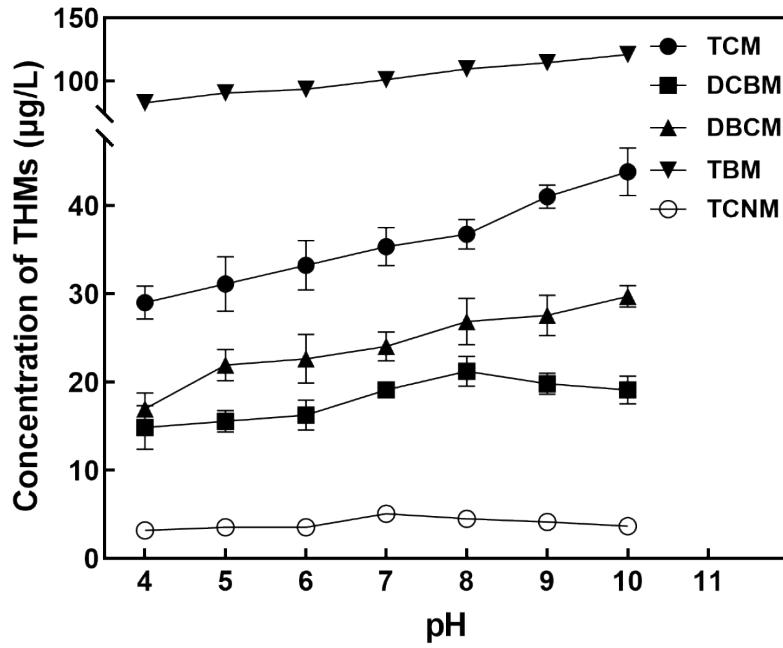

Figure S2. The effect of pH on the formation of THMs during ballast water chlorination under a certain condition ( $C(\text{NaClO})=10 \text{ mg/L}$ ,  $C(\text{TOC})=5.0 \text{ mg/L}$ ,  $C(\text{Br}^-)=68 \text{ mg/L}$ ,  $C(\text{I}^-)=60 \text{ mg/L}$ ,  $t=48 \text{ h}$ ,  $T=20 \text{ }^\circ\text{C}$ ).

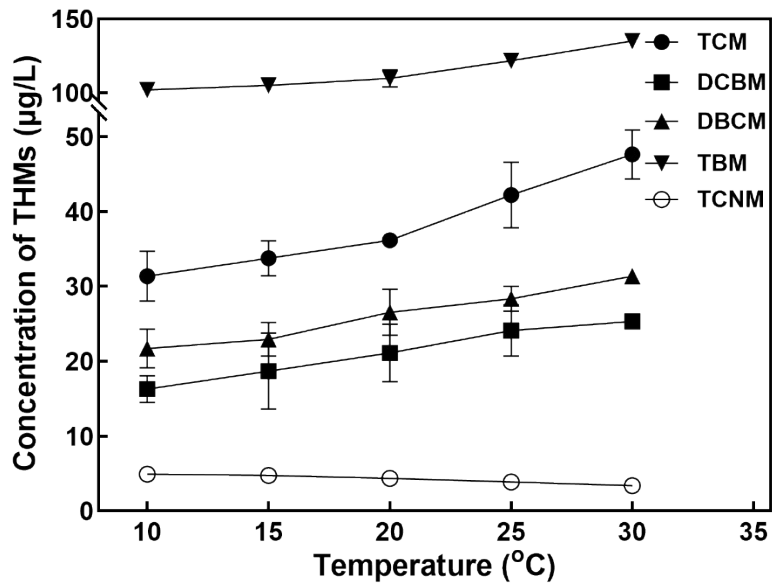

Figure S3. The effect of temperature on the formation of THMs during ballast water chlorination under a certain condition ( $C(\text{NaClO})=10 \text{ mg/L}$ ,  $C(\text{TOC})=5.0 \text{ mg/L}$ ,  $C(\text{Br}^-)=68 \text{ mg/L}$ ,  $C(\text{I}^-)=60 \text{ mg/L}$ ,  $t=48 \text{ h}$ ,  $\text{pH}=8$ ).

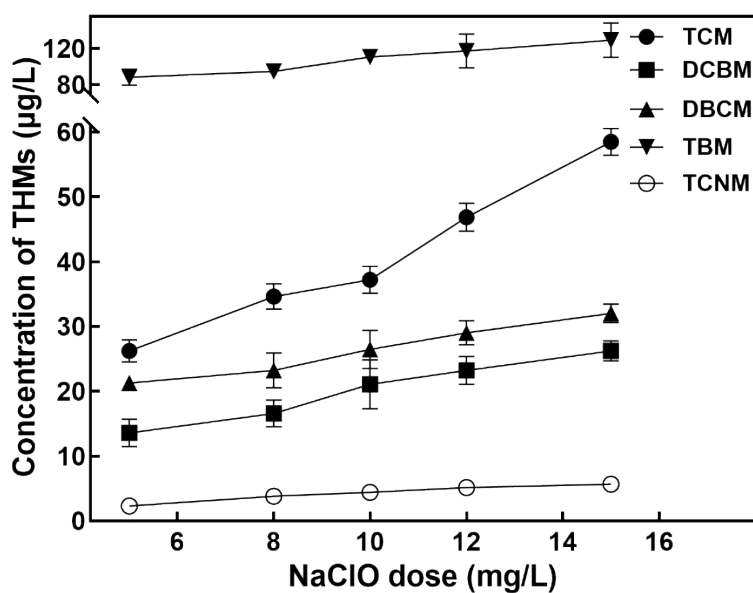

Figure S4. The effect of NaClO dose on the formation of THMs during ballast water chlorination under a certain condition ( $C(\text{TOC})=5.0$  mg/L,  $C(\text{Br}^-)=68$  mg/L,  $C(\text{I}^-)=60$  mg/L,  $t=48$  h,  $\text{pH}=8$ ,  $T=20$  °C).

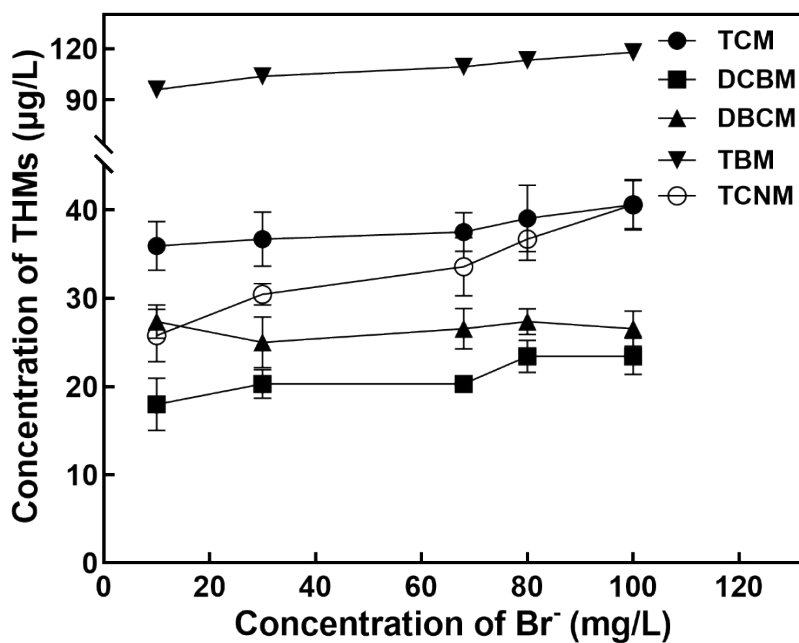

Figure S5. The effect of concentration of bromide on the formation of THMs during ballast water chlorination under a certain condition ( $C(\text{NaClO})=10$  mg/L,  $C(\text{TOC})=5.0$  mg/L,  $C(\text{I}^-)=60$  mg/L,  $t=48$  h,  $\text{pH}=8$ ,  $T=20$  °C).

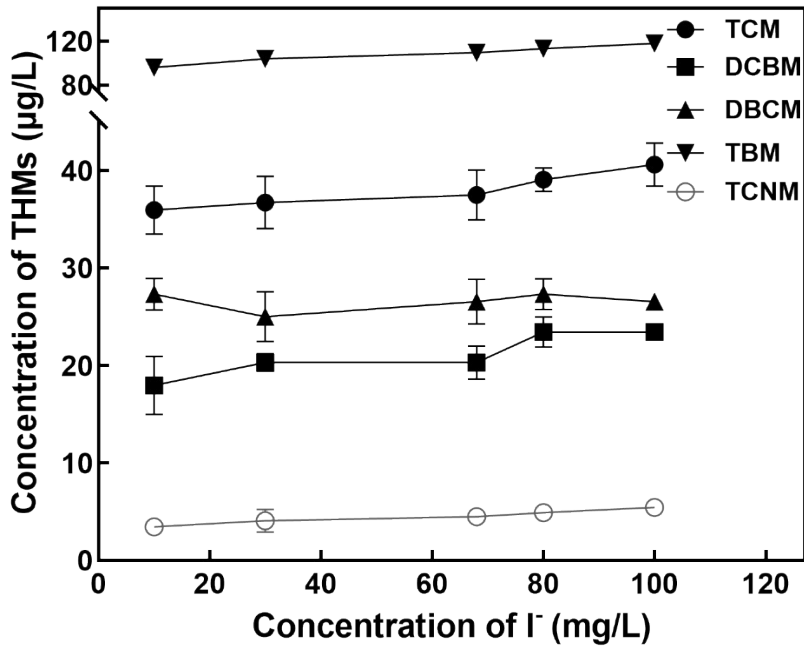

Figure S6. The effect of concentration of iodine on the formation of THMs during ballast water chlorination under a certain condition ( $C(\text{NaClO})=10 \text{ mg/L}$ ,  $C(\text{TOC})=5.0 \text{ mg/L}$ ,  $C(\text{Br}^-)=68 \text{ mg/L}$ ,  $t=48 \text{ h}$ ,  $\text{pH}=8$ ,  $T=20 \text{ }^\circ\text{C}$ ).

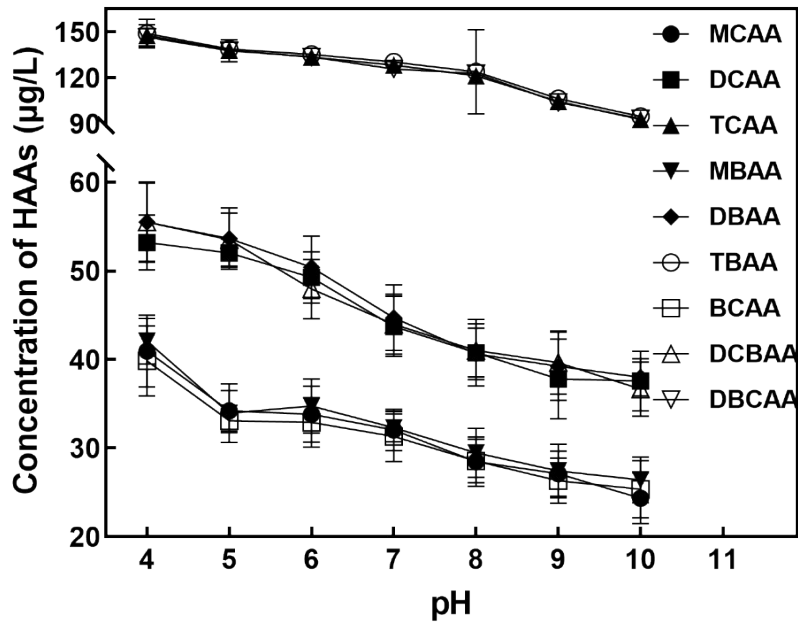

Figure S7. The effect of pH on the formation of HAAs during ballast water chlorination under a certain condition (i.e.,  $C(\text{NaClO})=10 \text{ mg/L}$ ,  $C(\text{TOC})=5.0 \text{ mg/L}$ ,  $C(\text{Br}^-)=68 \text{ mg/L}$ ,  $C(\text{I}^-)=60 \text{ mg/L}$ ,  $t=48 \text{ h}$ ,  $T=20 \text{ }^\circ\text{C}$ ).

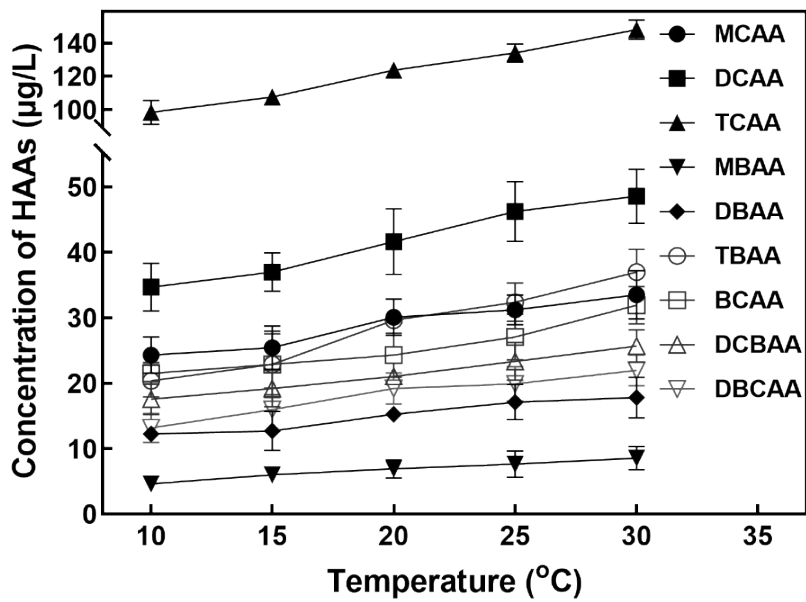

Figure S8. The effect of environment temperature on the formation of HAAs during ballast water chlorination under a certain condition (i.e.,  $C(\text{NaClO})=10$  mg/L,  $C(\text{TOC})=5.0$  mg/L,  $C(\text{Br}^-)=68$  mg/L,  $C(\text{I}^-)=60$  mg/L,  $t=48$  h,  $\text{pH}=8$ ).

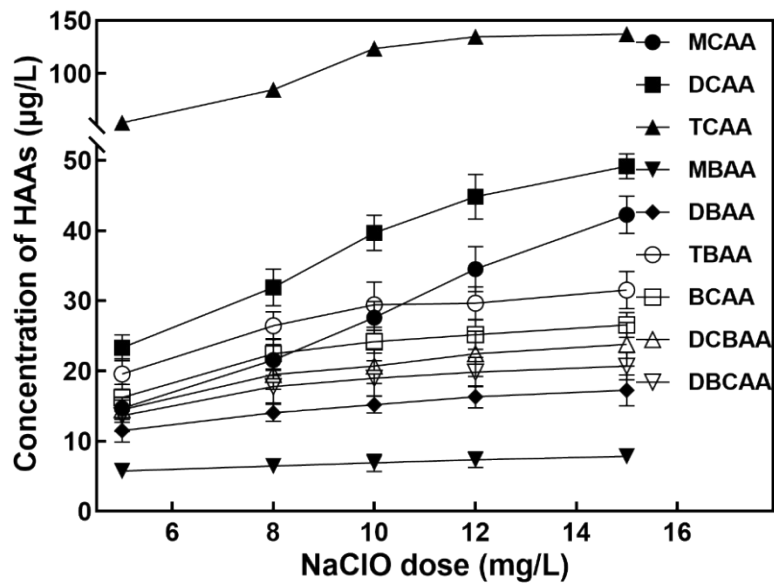

Figure S9. The effect of NaClO dose on the formation of HAAs during ballast water chlorination under a certain condition (i.e.,  $C(\text{TOC})=5.0$  mg/L,  $C(\text{Br}^-)=68$  mg/L,  $C(\text{I}^-)=60$  mg/L,  $t=48$  h,  $\text{pH}=8$ ,  $T=20$  °C).

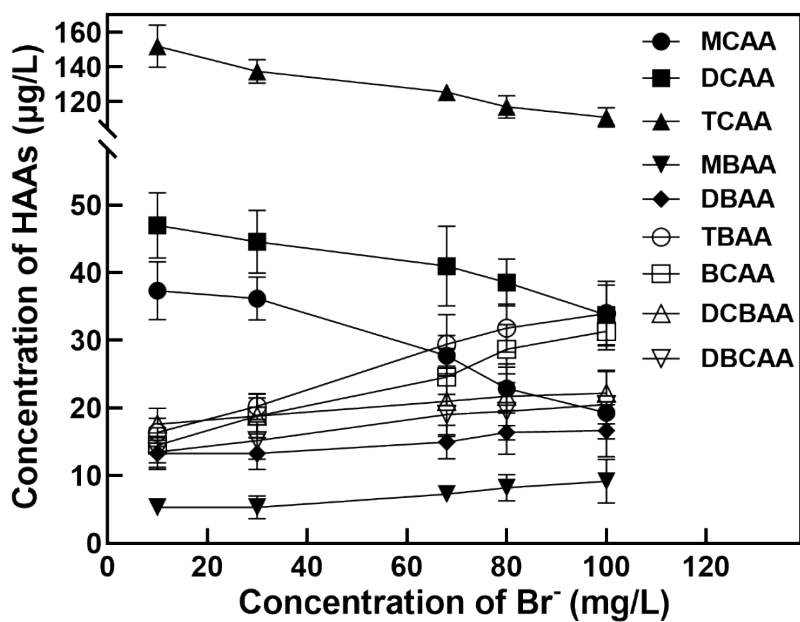

Figure S10. The effect of concentration of bromide on the formation of HAAs during ballast water chlorination under a certain condition (i.e.,  $C(\text{NaClO})=10$  mg/L,  $C(\text{TOC})=5.0$  mg/L,  $C(\text{I}^-)=60$  mg/L,  $t=48$  h,  $\text{pH}=8$ ,  $T=20$  °C).

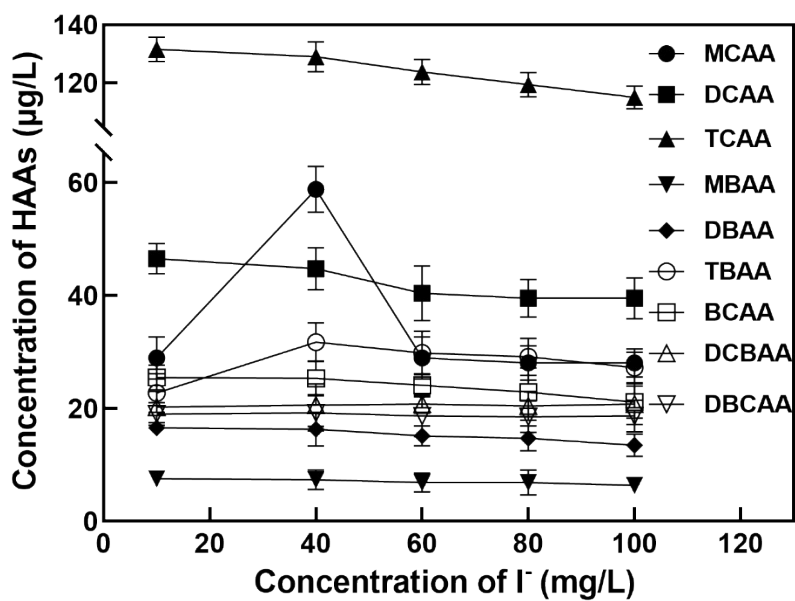

Figure S11. The effect of concentration of iodine on the formation of HAAs during ballast water chlorination under a certain condition (i.e.,  $C(\text{NaClO})=10$  mg/L,  $C(\text{TOC})=5.0$  mg/L,  $C(\text{Br}^-)=68$  mg/L,  $t=48$  h,  $\text{pH}=8$ ,  $T=20$  °C).
